# Supplementary material for: Effects of stock, sex, and muscle type on carcass characteristics and meat quality attributes of parent broiler breeders and broiler chickens
Source: PubMed Central journal article supplement — Poult Sci. 2019 Dec 17;98(12):6586–92. doi: 10.3382/ps/pez464 (PMC8913996; doi:10.3382/ps/pez464), 2019-12-17
Supplement: mmc1.pdf [file mmc1.pdf]

# CERTIFICATE OF ENGLISH EDITING

This document certifies that the paper listed below has been edited to ensure that the language is clear and free of errors. The edit was performed by professional editors at Edit age, a division of Cactus Communications. The intent of the author's message was not altered in any way during the editing process. The quality of the edit has been guaranteed, with the assumption that our suggested changes have been accepted and have not been further altered without the knowledge of our editors.

## TITLE OF THE PAPER

Effects of stock, sex, and muscle type on carcass characteristics and meat quality attributes of parent broiler breeders and broiler chickens

## AUTHORS

Ayman Swelum

## JOB CODE

KSDUN

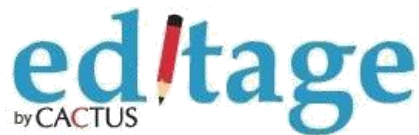

*Vikas Narang*  
Signature

Vikas Narang,  
Vice President, Author Services, Edit age

Date of Issue

**July 15, 2019**

Editage, a brand of Cactus Communications, offers professional English language editing and publication support services to authors engaged in over 500 areas of research. Through its community of experienced editors, which includes doctors, engineers, published scientists, and researchers with peer review experience, Editage has successfully helped authors get published in internationally reputed journals. Authors who work with Editage are guaranteed excellent language quality and timely delivery.

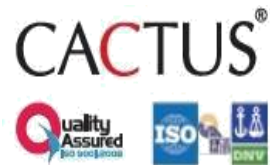

### Contact Edit age

World wide  
request@editage.com  
+1 877- 334- 8243  
www.editage.com

Japan  
subscriptions@editage.com  
+81 03- 6868- 3348  
www.editage.jp

Korea  
submit-  
korea@editage.com  
1544- 9241  
www.editage.co.kr

China  
fabiao@editage.cn  
400- 005- 6055  
www.editage.cn

Brazil  
inquiry.brazil@editage.com  
0800- 892- 20- 97  
www.editage.com.br

Taiwan  
submitjobs@editage.com  
02 2657 0306  
www.editage.com.tw
